# Supplementary material for: A New Integrative and Mobilizable Element Is a Major Contributor to Tetracycline Resistance in Streptococcus dysgalactiae subsp. equisimilis
Source: Antibiotics (Basel). 2023 Mar 15;12(3):579. doi: 10.3390/antibiotics12030579 (PMC10044688; doi:10.3390/antibiotics12030579)
Supplement: Supplementary file 1 [file antibiotics-12-00579-s001.zip › Supplementary material Table S1.xlsx]

## Sheet: Hoja1
Supplementary Table S1. Antibiotic resistance and mobile genetic elements in the 24 tetracycline-resistant strains																									WGS								WGS						WGS
ID	Accesion Number	Coverage	Year	Sample	Hospital	ST	gki	gtr	murI	mutS	recP	xpt	atoB	PEN DD	PEN MD	EUCAST	AMP DD	AMP MD	EUCAST	FOT MD	EUCAST	ERY DD	ERY MD	EUCAST	erm(B)	erm(TR)	erm(T)	mef(A)	mef(E)	CLI DD	CLI MD	EUCAST	lnu(B)	lsa(C)	lsa(E)	TET DD	TET MD	EUCAST	tet(M)	tet(L)	tet(O)	tet(W)	tet(W32)	tet(S)	CIP DD	CIP MD	EUCAST	LEV DD	LEV MD
SDSE-CSPT-1838301	ERS13423755	43.0	2018	Blood	CSPT	4	2	2	4	1	8	7	2	36	<0.03	S	30	<0.12	S	<0.06	S	27	<0.25	S	-	-	-	-	-	26	<0.25	S	-	-	-	11	>2	R	X	-	-	-	-	-	23	<2	-	23	<2
SDSE-HGUGM-3081M	ERS13423756	41.2	2018	Blood	HGUGM	15	3	3	2	2	9	8	2	35	<0.03	S	30	<0.12	S	<0.06	S	25	<0.25	S	-	-	-	-	-	23	<0.25	S	-	-	-	12	>2	R	X	-	-	-	-	-	22	<2	-	20	<2
SDSE-HUB-03968	ERS13423757	42.0	2013	Blood	HUB	127	3	2	1	5	7	33	3	33	<0.03	S	32	<0.12	S	<0.06	S	28	<0.25	S	-	-	-	-	-	25	<0.25	S	-	-	-	15	>2	R	X	-	-	-	-	-	24	<2	-	23	<2
SDSE-HUB-04484	ERS13423758	64.4	2016	Blood	HUB	4	2	2	4	1	8	7	2	35	<0.03	S	33	<0.12	S	<0.06	S	9	>0.5	R	-	-	X	-	-	26	<0.25	R	-	-	-	10	>2	R	X	-	-	-	-	-	25	<2	-	25	<2
SDSE-HUB-04529	ERS13423759	21.8	2016	Blood	HUB	15	3	3	2	2	9	8	2	31	<0.03	S	27	<0.12	S	<0.06	S	22	<0.25	S	-	-	-	-	-	20	<0.25	S	-	-	-	13	>2	R	X	-	-	-	-	-	21	<2	-	17	<2
SDSE-HUB-04540	ERS13423760	44.7	2016	Blood	HUB	15	3	3	2	2	9	8	2	36	<0.03	S	29	<0.12	S	<0.06	S	31	<0.25	S	-	-	-	-	-	28	<0.25	S	-	-	-	13	>2	R	X	-	-	-	-	-	21	<2	-	23	<2
SDSE-HUB-04609	ERS13423761	17.6	2016	Blood	HUB	15	3	3	2	2	9	8	2	29	<0.03	S	28	<0.12	S	<0.06	S	24	<0.25	S	-	-	-	-	-	20	<0.25	S	-	-	-	12	>2	R	X	-	-	-	-	-	21	<2	-	20	<2
SDSE-HUB-04842	ERS13423762	71.1	2017	Blood	HUB	SLV38	~1	1	1	1	1	1	1	34	<0.03	S	30	<0.12	S	<0.06	S	0	>0.5	R	-	X	-	-	-	21	<0.25	R	-	-	-	13	>2	R	X	-	-	-	-	-	24	<2	-	22	<2
SDSE-HUB-04895	ERS13423763	42.0	2017	Blood	HUB	141	3	2	2	8	1	8	19	34	<0.03	S	31	<0.12	S	<0.06	S	25	<0.25	S	-	-	-	-	-	23	<0.25	S	-	-	-	10	>2	R	X	-	-	-	-	-	22	<2	-	23	<2
SDSE-HUB-05128	ERS13423764	36.3	2018	Blood	HUB	27	2	2	4	1	13	12	7	34	<0.03	S	32	<0.12	S	<0.06	S	15	>0.5	R	-	-	-	-	X	24	<0.25	S	-	-	-	12	>2	R	X	-	-	-	-	-	23	<2	-	22	<2
SDSE-HUB-05189	ERS13423765	34.4	2018	Blood	HUB	8	1	1	1	1	1	1	4	34	<0.03	S	31	<0.12	S	<0.06	S	6	>0.5	R	X	-	-	-	-	17	>0.5	R	-	-	-	14	>2	R	X	-	-	-	-	-	21	<2	-	21	<2
SDSE-HUB-05387	ERS13423766	40.6	2019	Blood	HUB	31	3	2	4	1	8	7	2	32	<0.03	S	33	<0.12	S	<0.06	S	25	<0.25	S	-	-	-	-	-	26	<0.25	S	-	-	-	18	>2	R	X	-	-	-	-	-	23	<2	-	20	<2
SDSE-HUB-05597	ERS13423767	36.4	2019	Blood	HUB	127	3	2	1	5	7	33	3	34	<0.03	S	31	<0.12	S	<0.06	S	14	>0.5	R	X	-	-	-	-	11	>0.5	R	-	-	-	20	>2	R	X	-	-	-	-	-	24	<2	-	23	<2
SDSE-HUB-17401	ERS13423768	27.2	2013	Blood	HUB	15	3	3	2	2	9	8	2	32	<0.03	S	33	<0.12	S	<0.06	S	28	<0.25	S	-	-	-	-	-	28	<0.25	S	-	-	-	18	>2	R	X	-	-	-	-	-	23	<2	-	22	<2
SDSE-HUB-21399	ERS13423769	36.0	2015	Blood	HUB	SLV15	3	3	2	2	9	~8	2	35	<0.03	S	30	<0.12	S	<0.06	S	24	<0,25	S	-	-	-	-	-	22	<0,5	S	-	-	-	18	>2	R	X	-	-	-	-	-	22	<2	-	22	<2
SDSE-HUB-26134	ERS13423770	37.4	2017	Blood	HUB	15	3	3	2	2	9	8	2	40	<0.03	S	34	<0.12	S	<0.06	S	34	<0.25	S	-	-	-	-	-	36	<0.25	S	-	-	-	16	>2	R	X	-	-	-	-	-	28	<2	-	24	<2
SDSE-HUB-28049	ERS13423771	41.6	2018	Blood	HUB	15	3	3	2	2	9	8	2	30	<0.03	S	29	<0.12	S	<0.06	S	16	>0.5	R	-	X	-	-	-	22	<0.25	R	-	-	-	14	>2	R	X	-	-	-	-	-	21	<2	-	20	<2
SDSE-HUB-30360	ERS13423772	44.1	2019	Blood	HUB	15	3	3	2	2	9	8	2	26	<0.03	S	28	<0.12	S	<0.06	S	25	<0.25	S	-	-	-	-	-	21	<0.25	S	-	-	-	12	>2	R	X	-	-	-	-	-	20	<2	-	20	<2
SDSE-HUB-30963	ERS13423773	50.3	2019	Blood	HUB	15	3	3	2	2	9	8	2	33	<0.03	S	31	<0.12	S	<0.06	S	15	>0.5	R	-	X	-	-	-	20	<0.25	R	-	-	-	8	>2	R	X	-	-	-	-	-	19	<2	-	17	<2
SDSE-HUD-70117369	ERS13423774	44.3	2018	Blood	HUD	DLV8	1	1	1	1	1	4	1	33	<0.03	S	29	<0.12	S	<0.06	S	6	>0.5	R	-	X	-	-	-	24	<0.25	R	-	-	-	11	>2	R	X	-	-	-	-	-	22	<2	-	22	<2
SDSE-HUD-70950180	ERS13423775	49.9	2018	Blood	HUD	15	3	3	2	2	9	8	2	35	<0.03	S	31	<0.12	S	<0.06	S	26	<0.25	S	-	-	-	-	-	25	<0.25	S	-	-	-	12	>2	R	X	-	-	-	-	-	23	<2	-	23	<2
SDSE-HUD-70956031	ERS13423776	52.7	2018	Blood	HUD	15	3	3	2	2	9	8	2	33	<0.03	S	33	<0.12	S	<0.06	S	6	>0.5	R	-	X	-	-	-	25	<0.25	R	-	-	-	21	>2	R	X	-	-	-	-	-	22	<2	-	22	<2

[truncated: 22 more columns]
